# Supplementary material for: Anti-Vimentin Nanobody Decreases Glioblastoma Cell Invasion In Vitro and In Vivo
Source: MDPI journal article supplement (doi:10.3390/cancers15030573), 2023-01-17

1. Beta-catenin

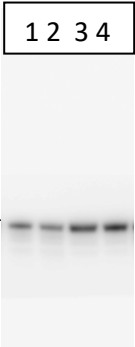

1 –NCH421k – Nb treatment  
2 – NCH421k – control  
3 –U87 – Nb treatment  
4 – U87 - control

|     |     |      |      |
|-----|-----|------|------|
| 941 | 854 | 1485 | 1563 |
|-----|-----|------|------|

GAPDH

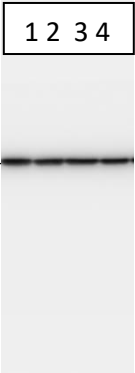

37 kDa

|      |      |      |      |
|------|------|------|------|
| 1739 | 1599 | 1529 | 1595 |
|------|------|------|------|

2. Vimentin

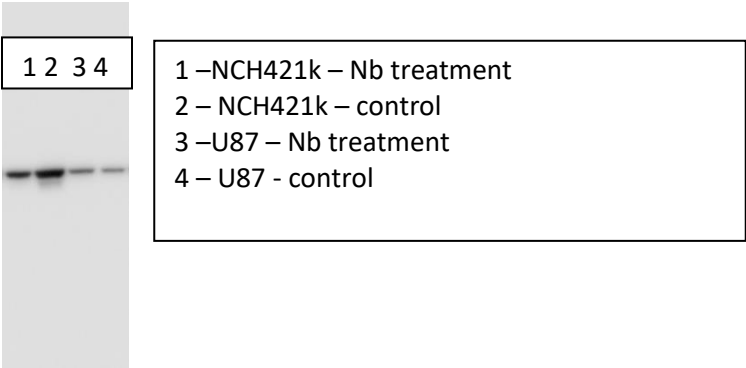

|      |      |      |     |
|------|------|------|-----|
| 1487 | 1988 | 1006 | 794 |
|------|------|------|-----|

GAPDH

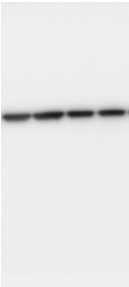

37 kDa

|      |      |      |      |
|------|------|------|------|
| 1396 | 1563 | 1429 | 1336 |
|------|------|------|------|

3. ZEB1

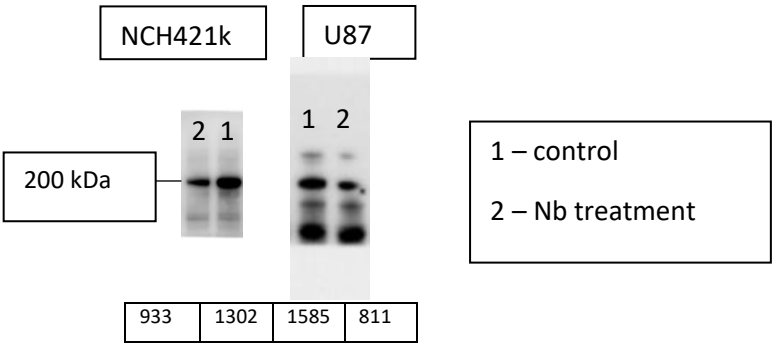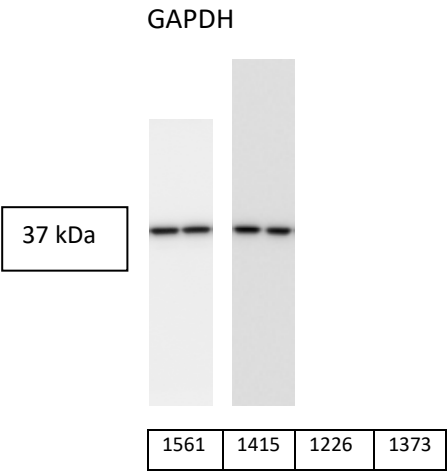

4. ZO1

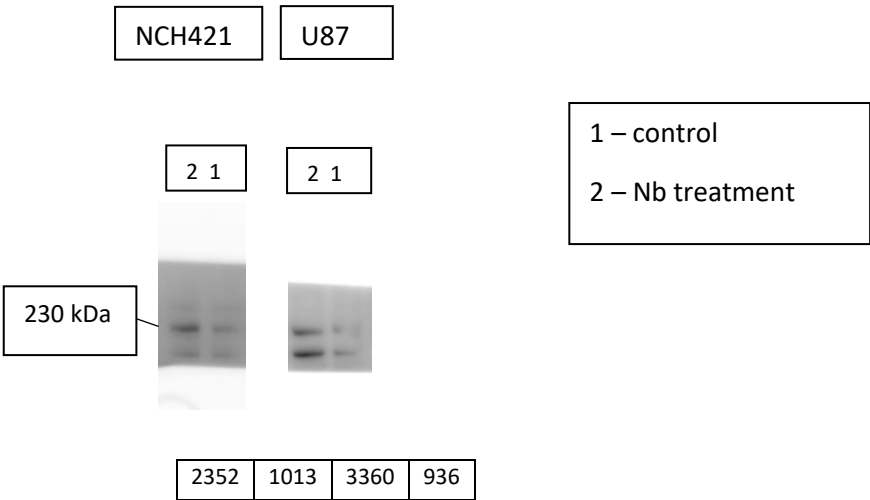

GAPDH

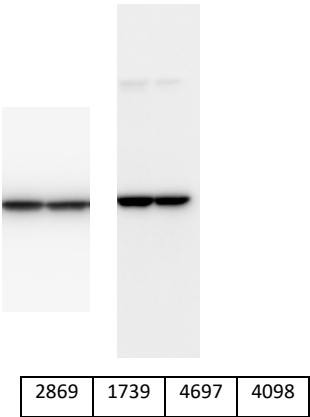

Supplement: s1 [file s1]
